# Supplementary material for: Fungicolous Fungi on Pseudosclerotial Plates and Apothecia of Hymenoscyphus fraxineus and Their Biocontrol Potential
Source: MDPI journal article supplement (doi:10.3390/microorganisms10112250), 2022-11-14
Supplement: s1 [file s1]

**Table S1.** Symptoms on apothecia and pseudosclerotial plates of *Hymenoscyphus fraxineus* up to three weeks after inoculation of ash petioles with test fungi.

| Fungal Taxa                 | Strain Number | Dying of <i>H. fraxineus</i> Apothecia <sup>1</sup> |                  | Symptoms on <i>H. fraxineus</i> Apothecia                                                                                                                            | Symptoms on Pseudosclerotium of <i>H. fraxineus</i>                         |
|-----------------------------|---------------|-----------------------------------------------------|------------------|----------------------------------------------------------------------------------------------------------------------------------------------------------------------|-----------------------------------------------------------------------------|
|                             |               | in vivo                                             | in Petrie dishes |                                                                                                                                                                      |                                                                             |
| <i>Clonostachys rosea</i>   | Fe213F        | sc                                                  | sc               | Initially brown points on the disc, late stage - apothecia turn brown, numerous hyphae and conidia on the hymenium (Figure 5a,b)                                     | Mycelium scarce                                                             |
|                             | Fe684F        | sc                                                  | sc               |                                                                                                                                                                      |                                                                             |
|                             | Fm884F        | sc                                                  |                  |                                                                                                                                                                      |                                                                             |
|                             | Fe886F        | mn                                                  | sc               |                                                                                                                                                                      |                                                                             |
|                             | Fe887F        |                                                     | sc               |                                                                                                                                                                      |                                                                             |
| <i>Clonostachys solani</i>  | Fe26K         |                                                     | mn               | Initially brown points on the disc, late stage - apothecia turn gray-brown, abundant sporulation on the hymenium (Figure 5c)                                         | Delicate and scarce mycelium                                                |
|                             | Fe888F        |                                                     | sc               |                                                                                                                                                                      |                                                                             |
| Corticiales sp. 1           | Fe18K         | sc                                                  | mn               | Apothecia turn gray-brown, numerous hyphae on the stipe and on the receptacle (Figure 5f)                                                                            | Mycelium scarce, more dense in places                                       |
| <i>Cordyceps</i> sp. 1      | Fe446K        | sc                                                  | mn               | Initially, hyphae are scarce, dying apothecia wrinkled, covered with numerous hyphae and conidia, thin mycelial cords (chemotropism) between apothecia (Figure 5d,e) | Hyphae more numerous only in the vicinity of the apothecia                  |
|                             | Fe457K        | sc                                                  | mn               |                                                                                                                                                                      |                                                                             |
|                             | Fe842F        | mn                                                  | mn               |                                                                                                                                                                      |                                                                             |
| <i>Cyathus olla</i>         | Fe141F        | mn                                                  | vn               | Apothecia are covered with dense mycelium and decline (Figure 5gh)                                                                                                   | Mycelium very abundant, covers the entire petiole                           |
| <i>Efibula</i> sp.1         | Fe287F        | mn                                                  | vn               | Apothecia covered with dense string-like mycelium and die off (Figure 5i)                                                                                            | Mycelium very abundantly covers the entire petioles, forming mycelial cords |
| <i>Fusarium</i> sp. 1       | Fe167F        | sc                                                  |                  | Apothecia colonized initially by single thread-like hyphae, the disc of the dying apothecia covered with numerous hyphae; symptoms of chemotropism (Figure 5m)       | Hyphae scarce, mainly in the form of single threads                         |
|                             | Fm409E        | mn                                                  |                  |                                                                                                                                                                      |                                                                             |
|                             | Fm410E        |                                                     | mn               |                                                                                                                                                                      |                                                                             |
|                             | Fm507K        |                                                     | sc               |                                                                                                                                                                      |                                                                             |
| <i>Gymnopus</i> sp. 1       | Fe1035F       | vn                                                  | vn               | Apothecia densely entwined by hyphae die off (Figure 5j)                                                                                                             | Mycelium very abundant, covers the entire petiole                           |
| <i>Minimidochium</i> sp. 1  | Fe173F        | sc                                                  |                  | Apothecia turn uniformly brown, the hymenium is covered with delicate floccose hyphae (Figure 5k)                                                                    | Hyphae scarce in the form of delicate flocks                                |
|                             |               |                                                     |                  |                                                                                                                                                                      |                                                                             |
| <i>Nemania diffusa</i>      | Fe831E        | mn                                                  | sc               | Affected apothecia turn brown, in time covered with numerous hyphae (Figure 5l)                                                                                      | Mycelium quite dense, covers quite large fragments of the pseudosclerotium  |
| <i>Pestalotiopsis</i> sp. 1 | Fe447K        | sc                                                  |                  | Apothecia, including hymenium, slowly turn brown, scarce hyphae, threadlike (Figure 5n)                                                                              | Hyphae scarce, threadlike                                                   |
|                             | Fe448K        |                                                     | sc               |                                                                                                                                                                      |                                                                             |
| Polyporales sp. 1           | Fe302F        | mn                                                  | vn               | Apothecia, covered with a dense                                                                                                                                      | Mycelium very                                                               |

|                               |         |    |    |                                                                                                                                  |                                                                                 |
|-------------------------------|---------|----|----|----------------------------------------------------------------------------------------------------------------------------------|---------------------------------------------------------------------------------|
|                               | Fe1011F | mn | vn | string of mycelium, die off (Figure 5o)                                                                                          | abundant, covers the entire pseudosclerotium                                    |
|                               | Fe1037F |    | vn |                                                                                                                                  |                                                                                 |
| <i>Trichoderma atroviride</i> | Fe57K   | sc | mn | Apothecia turn brown, covered with sparse mycelium and conidia (Figure 5p); new apothecia distorted on some petioles (Figure 5q) | Mycelium cobweb or threadlike, not very profuse                                 |
|                               | Fe377E  | sc | mn |                                                                                                                                  |                                                                                 |
|                               | Fe464K  | sc |    |                                                                                                                                  |                                                                                 |
| <i>Trichoderma harzianum</i>  | Fe412E  |    | vn | Apothecia die off, abundant accumulation of hyphae on the hymenium (Figure 5r)                                                   | Mycelium more numerous mainly between the apothecia                             |
|                               | Fm506K  | mn |    |                                                                                                                                  | Mycelium delicate all over petioles, and local cushion-shaped mycelium clusters |
| <i>Trichoderma polysporum</i> | Fe166F  | mn |    | Affected apothecia die, small aggregates of mycelium on the hymenium (Figure 5s)                                                 |                                                                                 |
| <i>Trichoderma rodmanii</i>   | Fe56K   | mn |    | Apothecia infested by a few threadlike hyphae slowly turn brown and die                                                          | Hyphae scarce on the entire petiole                                             |
| <i>Trichoderma tomentosum</i> | Fe460K  |    | mn | The disc affected by the filamentous hyphae turns brown, the apothecia die off                                                   | Numerous filamentous hyphae all over pseudosclerotium                           |
| <i>Trichoderma</i> sp. 1      | Fe242F  |    | mn | Apothecia die relatively quickly, covered with numerous threadlike hyphae (Figure 5t)                                            | Numerous threadlike hyphae in some places                                       |
|                               | Fe289F  | mn |    |                                                                                                                                  |                                                                                 |
|                               | Fe462K  |    | mn |                                                                                                                                  |                                                                                 |

---

<sup>1</sup> Dying of *H. fraxineus* apothecia: sc – scarce (<10%), mn – moderately numerous (11-50%), vn – very numerous (>50%).
